# Supplementary material
Source: HighWire-hosted journal article supplement (https://nutrition.bmj.com/content/5/1/62)
Supplement: inline-supplementary-material-1 [file inline-supplementary-material-1.pdf]

## Appendix

Table A1. Estimated Change in Log Calories (kcal) of Biscuits Purchased Due to Incentives Across the Household Purchasing Distribution.

| Dependent variable:             | Biscuits             | Biscuits             | Biscuits                    | Biscuits                    |
|---------------------------------|----------------------|----------------------|-----------------------------|-----------------------------|
| Log of calories (kcal) purchase | Mean                 | Median               | 25 <sup>th</sup> percentile | 75 <sup>th</sup> Percentile |
| Log of real price (£) per gram  | -0.432***<br>(0.006) | -0.432***<br>(0.005) | -0.456***<br>(0.005)        | -0.408***<br>(0.006)        |
| Price promotion in week         | 0.315***<br>(0.005)  | 0.315***<br>(0.004)  | 0.305***<br>(0.005)         | 0.325***<br>(0.004)         |
| Volume promotion in week        | 0.548***<br>(0.005)  | 0.547***<br>(0.004)  | 0.627***<br>(0.005)         | 0.469***<br>(0.004)         |
| Shopper age                     | 0.012<br>(0.008)     | 0.012<br>(0.008)     | 0.012<br>(0.008)            | 0.0130<br>(0.009)           |
| Shopper age squared/100         | -0.011*<br>(0.006)   | -0.011*<br>(0.007)   | -0.011*<br>(0.006)          | -0.011<br>(0.007)           |
| Household size                  | 0.043***<br>(0.010)  | 0.043***<br>(0.011)  | 0.035***<br>(0.012)         | 0.050***<br>(0.012)         |
| Years in panel                  | 0.021***<br>(0.005)  | 0.021***<br>(0.005)  | 0.027***<br>(0.007)         | 0.015**<br>(0.007)          |
| Weeks since last purchase       | -0.001***<br>(0.000) | -0.001***<br>(0.000) | -0.002***<br>(0.000)        | -0.002***<br>(0.000)        |
| Year (base 2006): 2007          | -0.047***<br>(0.011) | -0.047***<br>(0.012) | -0.053***<br>(0.014)        | -0.042***<br>(0.013)        |
| Year (base 2006): 2008          | -0.053***<br>(0.017) | -0.053***<br>(0.017) | -0.065***<br>(0.022)        | -0.041**<br>(0.020)         |
| Year (base 2006): 2009          | -0.069***<br>(0.024) | -0.069***<br>(0.024) | -0.076***<br>(0.029)        | -0.062**<br>(0.028)         |
| Year (base 2006): 2010          | -0.114***<br>(0.032) | -0.114***<br>(0.031) | -0.128***<br>(0.038)        | -0.101***<br>(0.037)        |
| Year (base 2006): 2011          | -0.158***<br>(0.039) | -0.158***<br>(0.041) | -0.176***<br>(0.045)        | -0.140***<br>(0.047)        |
| Year (base 2006): 2012          | -0.180***<br>(0.047) | -0.180***<br>(0.049) | -0.206***<br>(0.054)        | -0.154***<br>(0.055)        |
| Observations                    | 199886               | 199886               | 199886                      | 199886                      |
| Households                      | 3024                 | 3024                 | 3024                        | 3024                        |
| R <sup>2</sup>                  | 0.248                | -                    | -                           | -                           |

Clustered standard errors in parentheses (bootstrapped except for estimates at the mean)

\* p < 0.10, \*\* p < 0.05, \*\*\* p < 0.01

Table A2. Estimated Change in Log Calories (kcal) of Crisps Purchased Due to Incentives Across the Household Purchasing Distribution.

| Dependent variable:             | Crisps               | Crisps               | Crisps                      | Crisps                      |
|---------------------------------|----------------------|----------------------|-----------------------------|-----------------------------|
| Log of calories (kcal) purchase | Mean                 | Median               | 25 <sup>th</sup> percentile | 75 <sup>th</sup> Percentile |
| Log of real price (£) per gram  | -0.882***<br>(0.014) | -0.882***<br>(0.018) | -0.911***<br>(0.018)        | -0.852***<br>(0.015)        |
| Price promotion in week         | 0.072***<br>(0.007)  | 0.072***<br>(0.007)  | 0.056***<br>(0.008)         | 0.089***<br>(0.006)         |
| Volume promotion in week        | 0.421***<br>(0.007)  | 0.421***<br>(0.007)  | 0.458***<br>(0.009)         | 0.383***<br>(0.007)         |
| Shopper age                     | -0.011<br>(0.009)    | -0.011<br>(0.010)    | -0.010<br>(0.012)           | -0.012<br>(0.009)           |
| Shopper age squared/100         | 0.003<br>(0.008)     | 0.003<br>(0.010)     | -0.002<br>(0.009)           | 0.009<br>(0.009)            |
| Household size                  | 0.033***<br>(0.013)  | 0.033**<br>(0.013)   | 0.032**<br>(0.015)          | 0.034**<br>(0.014)          |
| Years in panel                  | 0.007<br>(0.006)     | 0.007<br>(0.006)     | 0.015**<br>(0.006)          | -0.002<br>(0.006)           |
| Weeks since last purchase       | -0.002***<br>(0.000) | -0.002***<br>(0.000) | -0.002***<br>(0.000)        | -0.001***<br>(0.000)        |
| Year (base 2006): 2007          | 0.025**<br>(0.012)   | 0.025**<br>(0.012)   | 0.033***<br>(0.013)         | 0.017<br>(0.012)            |
| Year (base 2006): 2008          | 0.081***<br>(0.018)  | 0.081***<br>(0.019)  | 0.093***<br>(0.023)         | 0.069***<br>(0.018)         |
| Year (base 2006): 2009          | 0.082***<br>(0.025)  | 0.082***<br>(0.026)  | 0.087***<br>(0.033)         | 0.076***<br>(0.023)         |
| Year (base 2006): 2010          | 0.075**<br>(0.032)   | 0.075**<br>(0.034)   | 0.081*<br>(0.044)           | 0.069**<br>(0.029)          |
| Year (base 2006): 2011          | 0.067*<br>(0.040)    | 0.067<br>(0.042)     | 0.072<br>(0.052)            | 0.061*<br>(0.036)           |
| Year (base 2006): 2012          | 0.060<br>(0.047)     | 0.060<br>(0.051)     | 0.063<br>(0.063)            | 0.057<br>(0.043)            |
| Observations                    | 135399               | 135399               | 135399                      | 135399                      |
| Households                      | 3024                 | 3024                 | 3024                        | 3024                        |
| R <sup>2</sup>                  | 0.302                | -                    | -                           | -                           |

Clustered standard errors in parentheses (bootstrapped except for estimates at the mean)

\* p &lt; 0.10, \*\* p &lt; 0.05, \*\*\* p &lt; 0.01

Table A3. Estimated Change in Log Calories (kcal) of Snacks Purchased Due to Incentives Across the Household Purchasing Distribution.

| Dependent variable:             | Snacks               | Snacks               | Snacks                      | Snacks                      |
|---------------------------------|----------------------|----------------------|-----------------------------|-----------------------------|
| Log of calories (kcal) purchase | Mean                 | Median               | 25 <sup>th</sup> percentile | 75 <sup>th</sup> Percentile |
| Log of real price (£) per gram  | -0.638***<br>(0.010) | -0.639***<br>(0.010) | -0.708***<br>(0.011)        | -0.569***<br>(0.011)        |
| Price promotion in week         | 0.234***<br>(0.006)  | 0.234***<br>(0.007)  | 0.217***<br>(0.007)         | 0.252***<br>(0.005)         |
| Volume promotion in week        | 0.575***<br>(0.006)  | 0.576***<br>(0.005)  | 0.634***<br>(0.007)         | 0.517***<br>(0.005)         |
| Shopper age                     | -0.008<br>(0.009)    | -0.008<br>(0.012)    | -0.011<br>(0.013)           | -0.006<br>(0.009)           |
| Shopper age squared/100         | 0.001<br>(0.008)     | 0.001<br>(0.008)     | 0.005<br>(0.010)            | -0.003<br>(0.008)           |
| Household size                  | 0.040***<br>(0.011)  | 0.040***<br>(0.011)  | 0.038***<br>(0.014)         | 0.042***<br>(0.011)         |
| Years in panel                  | 0.013**<br>(0.006)   | 0.013**<br>(0.006)   | 0.025***<br>(0.007)         | 0.001<br>(0.006)            |
| Weeks since last purchase       | -0.001***<br>(0.000) | -0.001***<br>(0.000) | -0.001***<br>(0.000)        | -0.001**<br>(0.000)         |
| Year (base 2006): 2007          | 0.000<br>(0.013)     | -0.000<br>(0.013)    | -0.007<br>(0.015)           | 0.001<br>(0.014)            |
| Year (base 2006): 2008          | 0.032<br>(0.021)     | 0.032<br>(0.024)     | 0.016<br>(0.024)            | 0.048**<br>(0.023)          |
| Year (base 2006): 2009          | 0.028<br>(0.029)     | 0.028<br>(0.032)     | 0.011<br>(0.035)            | 0.045<br>(0.029)            |
| Year (base 2006): 2010          | -0.002<br>(0.037)    | -0.002<br>(0.043)    | -0.022<br>(0.046)           | 0.019<br>(0.039)            |
| Year (base 2006): 2011          | -0.012<br>(0.047)    | -0.012<br>(0.054)    | -0.049<br>(0.056)           | 0.026<br>(0.047)            |
| Year (base 2006): 2012          | -0.003<br>(0.056)    | -0.004<br>(0.065)    | -0.053<br>(0.068)           | 0.047<br>(0.056)            |
| Observations                    | 118654               | 118654               | 118654                      | 118654                      |
| Households                      | 3024                 | 3024                 | 3024                        | 3024                        |
| R <sup>2</sup>                  | 0.330                | -                    | -                           | -                           |

Clustered standard errors in parentheses (bootstrapped except for estimates at the mean)

\* p < 0.10, \*\* p < 0.05, \*\*\* p < 0.01

Table A4. Estimated Change in Log Calories (kcal) of Biscuits Purchased Due to Incentives Across the Household Income Distribution.

| Dependent variable:             | Biscuits             | Biscuits             | Biscuits             |
|---------------------------------|----------------------|----------------------|----------------------|
| Log of calories (kcal) purchase | Low income           | Middle income        | High income          |
| Log of real price (£) per gram  | -0.418***<br>(0.008) | -0.436***<br>(0.009) | -0.453***<br>(0.011) |
| Price promotion in week         | 0.303***<br>(0.007)  | 0.330***<br>(0.007)  | 0.308***<br>(0.010)  |
| Volume promotion in week        | 0.534***<br>(0.009)  | 0.552***<br>(0.007)  | 0.561***<br>(0.009)  |
| Shopper age                     | -0.005<br>(0.015)    | 0.035<br>(0.032)     | -0.001<br>(0.016)    |
| Shopper age squared/100         | 0.004<br>(0.011)     | -0.022**<br>(0.011)  | -0.005<br>(0.017)    |
| Household size                  | 0.060***<br>(0.021)  | 0.044**<br>(0.020)   | -0.008<br>(0.020)    |
| Years in panel                  | 0.019**<br>(0.008)   | 0.022**<br>(0.008)   | 0.024**<br>(0.011)   |
| Weeks since last purchase       | -0.002***<br>(0.001) | -0.001<br>(0.001)    | -0.001*<br>(0.001)   |
| Year (base 2006): 2007          | -0.055***<br>(0.018) | -0.042<br>(0.033)    | -0.041*<br>(0.021)   |
| Year (base 2006): 2008          | -0.061**<br>(0.028)  | -0.044<br>(0.059)    | -0.032<br>(0.032)    |
| Year (base 2006): 2009          | -0.086**<br>(0.041)  | -0.071<br>(0.090)    | -0.029<br>(0.042)    |
| Year (base 2006): 2010          | -0.135**<br>(0.054)  | -0.120<br>(0.120)    | -0.077<br>(0.054)    |
| Year (base 2006): 2011          | -0.180***<br>(0.068) | -0.180<br>(0.150)    | -0.102<br>(0.065)    |
| Year (base 2006): 2012          | -0.194**<br>(0.082)  | -0.212<br>(0.180)    | -0.135*<br>(0.076)   |
| Observations                    | 78009                | 79432                | 42441                |
| Households                      | 1226                 | 1351                 | 754                  |
| R <sup>2</sup>                  | 0.234                | 0.252                | 0.262                |

Clustered standard errors in parentheses

\*  $p < 0.10$ , \*\*  $p < 0.05$ , \*\*\*  $p < 0.01$

Table A5. Estimated Change in Log Calories (kcal) of Crisps Purchased Due to Incentives Across the Household Income Distribution.

| Dependent variable:             | Crisps               | Crisps               | Crisps               |
|---------------------------------|----------------------|----------------------|----------------------|
| Log of calories (kcal) purchase | Low income           | Middle income        | High income          |
| Log of real price (£) per gram  | -0.873***<br>(0.024) | -0.874***<br>(0.022) | -0.894***<br>(0.028) |
| Price promotion in week         | 0.080***<br>(0.011)  | 0.067***<br>(0.010)  | 0.075***<br>(0.013)  |
| Volume promotion in week        | 0.408***<br>(0.013)  | 0.424***<br>(0.010)  | 0.431***<br>(0.013)  |
| Shopper age                     | -0.031<br>(0.021)    | -0.027<br>(0.022)    | 0.032*<br>(0.017)    |
| Shopper age squared/100         | 0.026*<br>(0.015)    | 0.003<br>(0.013)     | -0.040**<br>(0.017)  |
| Household size                  | -0.013<br>(0.031)    | 0.010<br>(0.024)     | 0.080***<br>(0.024)  |
| Years in panel                  | 0.020**<br>(0.010)   | 0.004<br>(0.009)     | -0.006<br>(0.011)    |
| Weeks since last purchase       | -0.001***<br>(0.000) | -0.001***<br>(0.000) | -0.002***<br>(0.001) |
| Year (base 2006): 2007          | 0.007<br>(0.030)     | 0.034<br>(0.024)     | 0.062***<br>(0.021)  |
| Year (base 2006): 2008          | 0.060<br>(0.048)     | 0.095**<br>(0.039)   | 0.095***<br>(0.029)  |
| Year (base 2006): 2009          | 0.037<br>(0.072)     | 0.119**<br>(0.057)   | 0.107***<br>(0.039)  |
| Year (base 2006): 2010          | 0.032<br>(0.096)     | 0.114<br>(0.075)     | 0.110**<br>(0.049)   |
| Year (base 2006): 2011          | 0.005<br>(0.120)     | 0.130<br>(0.094)     | 0.101*<br>(0.059)    |
| Year (base 2006): 2012          | -0.025<br>(0.144)    | 0.142<br>(0.113)     | 0.112<br>(0.070)     |
| Observations                    | 48281                | 55091                | 32014                |
| Households                      | 1211                 | 1338                 | 751                  |
| R <sup>2</sup>                  | 0.296                | 0.300                | 0.313                |

Clustered standard errors in parentheses

\*  $p < 0.10$ , \*\*  $p < 0.05$ , \*\*\*  $p < 0.01$

Table A6. Estimated Change in Log Calories (kcal) of Snacks Purchased Due to Incentives Across the Household Income Distribution.

| Dependent variable:             | Snacks               | Snacks               | Snacks               |
|---------------------------------|----------------------|----------------------|----------------------|
| Log of calories (kcal) purchase | Low income           | Middle income        | High income          |
| Log of real price (£) per gram  | -0.623***<br>(0.017) | -0.654***<br>(0.016) | -0.636***<br>(0.018) |
| Price promotion in week         | 0.225***<br>(0.010)  | 0.241***<br>(0.010)  | 0.236***<br>(0.011)  |
| Volume promotion in week        | 0.566***<br>(0.010)  | 0.574***<br>(0.009)  | 0.586***<br>(0.011)  |
| Shopper age                     | -0.006<br>(0.017)    | 0.069***<br>(0.025)  | 0.017<br>(0.014)     |
| Shopper age squared/100         | 0.011<br>(0.013)     | 0.002<br>(0.014)     | -0.043***<br>(0.015) |
| Household size                  | 0.072***<br>(0.026)  | 0.050**<br>(0.020)   | -0.007<br>(0.025)    |
| Years in panel                  | 0.008<br>(0.011)     | 0.018*<br>(0.010)    | 0.011<br>(0.012)     |
| Weeks since last purchase       | -0.001**<br>(0.000)  | -0.001**<br>(0.000)  | -0.002***<br>(0.001) |
| Year (base 2006): 2007          | -0.026<br>(0.024)    | -0.072**<br>(0.028)  | 0.041*<br>(0.022)    |
| Year (base 2006): 2008          | 0.011<br>(0.039)     | -0.093**<br>(0.047)  | 0.073**<br>(0.035)   |
| Year (base 2006): 2009          | -0.003<br>(0.055)    | -0.191***<br>(0.068) | 0.100**<br>(0.045)   |
| Year (base 2006): 2010          | -0.041<br>(0.074)    | -0.301***<br>(0.091) | 0.079<br>(0.054)     |
| Year (base 2006): 2011          | -0.061<br>(0.092)    | -0.396***<br>(0.115) | 0.086<br>(0.067)     |
| Year (base 2006): 2012          | -0.053<br>(0.111)    | -0.482***<br>(0.139) | 0.117<br>(0.079)     |
| Observations                    | 40190                | 47868                | 30578                |
| Households                      | 1212                 | 1342                 | 745                  |
| R <sup>2</sup>                  | 0.320                | 0.334                | 0.337                |

Clustered standard errors in parentheses

\*  $p < 0.10$ , \*\*  $p < 0.05$ , \*\*\*  $p < 0.01$

Table A7. Estimated Change in Log Calories (kcal) of Biscuits Purchased Due to Incentives by Household Type

| Dependent variable:             | Biscuits             | Biscuits             |
|---------------------------------|----------------------|----------------------|
| Log of calories (kcal) purchase | No children          | With children        |
| Log of real price (£) per gram  | -0.418***<br>(0.007) | -0.456***<br>(0.008) |
| Price promotion in week         | 0.295***<br>(0.006)  | 0.347***<br>(0.007)  |
| Volume promotion in week        | 0.530***<br>(0.006)  | 0.573***<br>(0.008)  |
| Shopper age                     | -0.018<br>(0.011)    | 0.040*<br>(0.021)    |
| Shopper age squared/100         | 0.013<br>(0.008)     | -0.031<br>(0.023)    |
| Household size                  | 0.035**<br>(0.015)   | 0.065***<br>(0.019)  |
| Years in panel                  | 0.013**<br>(0.006)   | 0.034***<br>(0.009)  |
| Weeks since last purchase       | -0.001***<br>(0.000) | -0.002**<br>(0.001)  |
| Year (base 2006): 2007          | -0.035**<br>(0.014)  | -0.078***<br>(0.019) |
| Year (base 2006): 2008          | -0.030<br>(0.022)    | -0.106***<br>(0.032) |
| Year (base 2006): 2009          | -0.031<br>(0.031)    | -0.154***<br>(0.046) |
| Year (base 2006): 2010          | -0.065<br>(0.040)    | -0.223***<br>(0.060) |
| Year (base 2006): 2011          | -0.109**<br>(0.050)  | -0.265***<br>(0.074) |
| Year (base 2006): 2012          | -0.135**<br>(0.059)  | -0.285***<br>(0.088) |
| Observations                    | 127041               | 72843                |
| Households                      | 1896                 | 1261                 |
| R <sup>2</sup>                  | 0.235                | 0.268                |

Clustered standard errors in parentheses

\*  $p < 0.10$ , \*\*  $p < 0.05$ , \*\*\*  $p < 0.01$

Table A8. Estimated Change in Log Calories (kcal) of Crisps Purchased Due to Incentives by Household Type

| Dependent variable:             | Crisps               | Crisps               |
|---------------------------------|----------------------|----------------------|
| Log of calories (kcal) purchase | No children          | With children        |
| Log of real price (£) per gram  | -0.826***<br>(0.018) | -0.972***<br>(0.023) |
| Price promotion in week         | 0.080***<br>(0.008)  | 0.063***<br>(0.011)  |
| Volume promotion in week        | 0.421***<br>(0.009)  | 0.420***<br>(0.011)  |
| Shopper age                     | -0.036***<br>(0.012) | 0.021<br>(0.018)     |
| Shopper age squared/100         | 0.022**<br>(0.011)   | -0.030<br>(0.020)    |
| Household size                  | 0.014<br>(0.021)     | 0.0092<br>(0.025)    |
| Years in panel                  | 0.006<br>(0.007)     | 0.007<br>(0.009)     |
| Weeks since last purchase       | -0.002***<br>(0.000) | -0.001**<br>(0.001)  |
| Year (base 2006): 2007          | 0.028*<br>(0.017)    | 0.020<br>(0.017)     |
| Year (base 2006): 2008          | 0.083***<br>(0.026)  | 0.083***<br>(0.028)  |
| Year (base 2006): 2009          | 0.085**<br>(0.036)   | 0.086**<br>(0.037)   |
| Year (base 2006): 2010          | 0.095**<br>(0.047)   | 0.049<br>(0.047)     |
| Year (base 2006): 2011          | 0.078<br>(0.057)     | 0.063<br>(0.057)     |
| Year (base 2006): 2012          | 0.072<br>(0.067)     | 0.056<br>(0.067)     |
| Observations                    | 85358                | 50036                |
| Households                      | 1894                 | 1259                 |
| R <sup>2</sup>                  | 0.289                | 0.322                |

Clustered standard errors in parentheses

\*  $p < 0.10$ , \*\*  $p < 0.05$ , \*\*\*  $p < 0.01$



Table A9. Estimated Change in Log Calories (kcal) of Snacks Purchased Due to Incentives by Household Type

| Dependent variable:             | Snacks               | Snacks               |
|---------------------------------|----------------------|----------------------|
| Log of calories (kcal) purchase | No children          | With children        |
| Log of real price (£) per gram  | -0.633***<br>(0.014) | -0.646***<br>(0.014) |
| Price promotion in week         | 0.206***<br>(0.008)  | 0.264***<br>(0.008)  |
| Volume promotion in week        | 0.565***<br>(0.008)  | 0.584***<br>(0.008)  |
| Shopper age                     | -0.028**<br>(0.012)  | 0.016<br>(0.015)     |
| Shopper age squared/100         | 0.015<br>(0.011)     | -0.020<br>(0.017)    |
| Household size                  | 0.053***<br>(0.017)  | 0.025<br>(0.023)     |
| Years in panel                  | 0.0001<br>(0.009)    | 0.028***<br>(0.009)  |
| Weeks since last purchase       | -0.001***<br>(0.000) | -0.001**<br>(0.001)  |
| Year (base 2006): 2007          | 0.030*<br>(0.017)    | -0.028*<br>(0.017)   |
| Year (base 2006): 2008          | 0.083***<br>(0.028)  | -0.012<br>(0.028)    |
| Year (base 2006): 2009          | 0.097***<br>(0.036)  | -0.037<br>(0.039)    |
| Year (base 2006): 2010          | 0.085*<br>(0.045)    | -0.088*<br>(0.050)   |
| Year (base 2006): 2011          | 0.092*<br>(0.056)    | -0.118*<br>(0.064)   |
| Year (base 2006): 2012          | 0.112*<br>(0.066)    | -0.124<br>(0.076)    |
| Observations                    | 62640                | 56008                |
| Households                      | 1896                 | 1258                 |
| R <sup>2</sup>                  | 0.327                | 0.334                |

Clustered standard errors in parentheses

\*  $p < 0.10$ , \*\*  $p < 0.05$ , \*\*\*  $p < 0.01$
